# Supplementary material
Source: PubMed Central journal article supplement (PMC8454503)
Supplement: ehp8459.s001.acco.pdf [file ehp8459.s001.acco.pdf]

**Note to readers with disabilities:** *EHP* strives to ensure that all journal content is accessible to all readers. However, some figures and Supplemental Material published in *EHP* articles may not conform to [508 standards](#) due to the complexity of the information being presented. If you need assistance accessing journal content, please contact [ehp508@niehs.nih.gov](mailto:ehp508@niehs.nih.gov). Our staff will work with you to assess and meet your accessibility needs within 3 working days.

### **Supplemental Material**

#### **Monitoring Drinking Water Quality in Nationally Representative Household Surveys in Low- and Middle-Income Countries: Cross-Sectional Analysis of 27 Multiple Indicator Cluster Surveys 2014–2020**

Robert Bain, Richard Johnston, Shane Khan, Attila Hancioglu, and Tom Slaymaker

#### **Table of Contents**

##### ***Water testing equipment and consumables***

**Figure S1. Equipment and consumables used for water quality testing** Photo credit: Yadigar Coskun.

##### **Differences in *E. coli* risk level between point of collection and point of use**

**Figure S2. Change in *E. coli* risk level for households.** Differences refer to changes in risk classification based on the number of colony forming units (CFU) per 100 mL as follows: <1 “Low risk”, 1-10 “Moderate risk”, 11-100 “High risk” and >100 “Very high risk”. CAR – Central African Republic, LaoPDR – Lao People’s Democratic Republic, STP – Sao Tome and Principe.

##### **Differences in *E. coli* risk level for households with *E. coli* detected at point of collection and reporting appropriate treatment practices**

**Figure S3. Difference in *E. coli* risk level between point of collection and point of use for households with *E. coli* detected at point of collection and reporting appropriate treatment practices.** Differences refer to changes in risk classification based on the number of colony forming units (CFU) per 100 mL as follows: <1 “Low risk”, 1-10 “Moderate risk”, 11-100 “High risk” and >100 “Very high risk”. Appropriate water treatment practices include boiling, filtration, adding chlorine and solar disinfection. CAR – Central African Republic, LaoPDR – Lao People’s Democratic Republic, STP – Sao Tome and Principe. Excludes STP and Palestine where <25 samples available for households with contamination at the point of collection and reporting appropriate household water treatment practices.

***E. coli* risk level at point of use for households with *E. coli* detected at point of collection and reporting appropriate treatment practices**

**Figure S4. *E. coli* risk level at point of use for households with contaminated drinking water sources reporting appropriate treatment practices.** Appropriate water treatment practices include boiling, filtration, adding chlorine and solar disinfection. CAR – Central African Republic, LaoPDR – Lao People’s Democratic Republic, STP – Sao Tome and Principe. Excludes STP and Palestine where <25 samples available for households with contamination at the point of collection and reporting appropriate household water treatment practices.

**Inconsistency checks**

**Table S1.** Proportion of *E. coli* samples flagged as potentially inconsistent.

**Blanks tests results**

**Table S2.** Proportion of blank tests with detectable *E. coli*.

**Main source versus source of sample**

**Table S3.** Concordance between main water source and source of the sample of drinking water provided by survey respondents.

**Table S4.** Mean monthly precipitation above yearly mean precipitation.

**Main reasons point of collection sample not collected**

**Table S5.** Main reasons point of collection sample not collected.

**Main reasons drinking water unavailable**

**Table S6.** Main reasons drinking water unavailable.

**Additional File-** Excel Document

## Water testing equipment and consumables

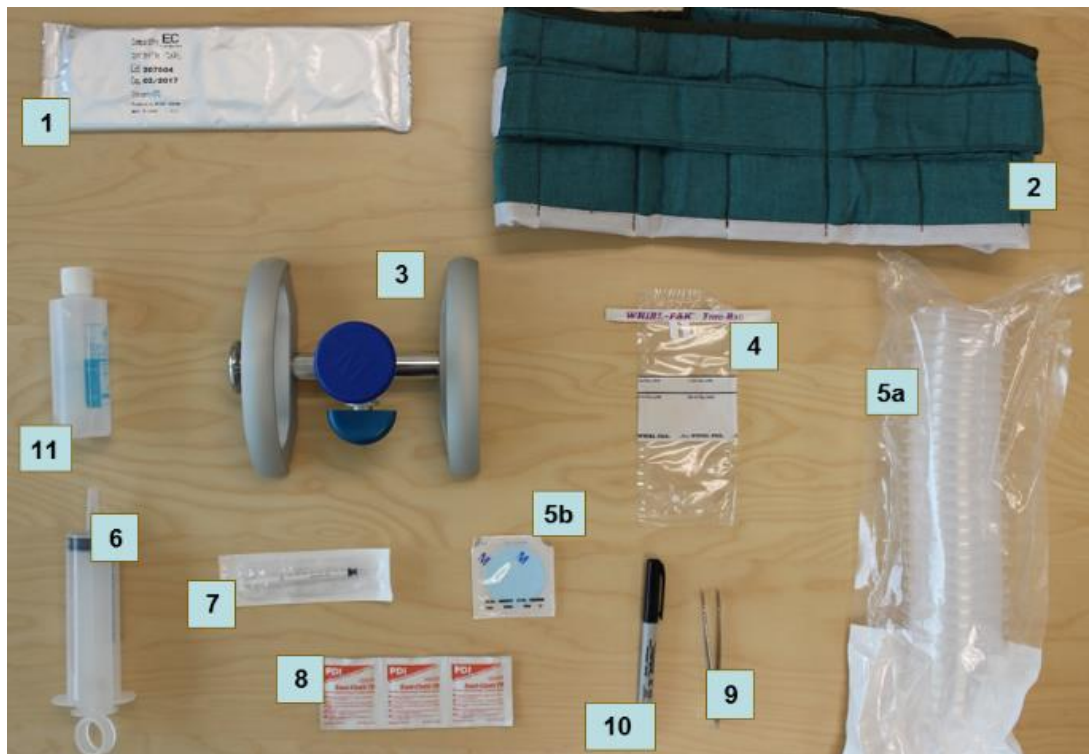

**Figure S1: Equipment and consumables used for water quality testing**

Photo credit: Yadigar Coskun

|                                                                                                                                                                                                                                                                                                                                                                                                                                                            |                                                                                                                                                                                                                                                                                                                                                |
|------------------------------------------------------------------------------------------------------------------------------------------------------------------------------------------------------------------------------------------------------------------------------------------------------------------------------------------------------------------------------------------------------------------------------------------------------------|------------------------------------------------------------------------------------------------------------------------------------------------------------------------------------------------------------------------------------------------------------------------------------------------------------------------------------------------|
| <ol style="list-style-type: none"><li>1. CompactDry™ plates (<i>E. coli</i>)</li><li>2. Incubation belt</li><li>3. Membrane filtration manifold</li><li>4. WhirlPak™ bags for sample collection</li><li>5a. Funnels</li><li>5b. Filter membrane</li><li>6. Large syringe (100 mL)</li><li>7. 1 mL disposable syringe</li><li>8. Alcohol wipe</li><li>8. Incubation belt</li><li>9. Marker pen</li><li>10. Forceps</li><li>11. Hand sanitizer gel</li></ol> | <p>Additional equipment:</p> <ul style="list-style-type: none"><li>• Bags for transporting the water testing kit</li><li>• Tissue paper</li><li>• Waste disposal bags</li><li>• Mineral or deionized water for blank test</li><li>• Household bleach solution*</li><li>• Bucket for disinfection*</li><li>• Gloves for disinfection*</li></ul> |
|------------------------------------------------------------------------------------------------------------------------------------------------------------------------------------------------------------------------------------------------------------------------------------------------------------------------------------------------------------------------------------------------------------------------------------------------------------|------------------------------------------------------------------------------------------------------------------------------------------------------------------------------------------------------------------------------------------------------------------------------------------------------------------------------------------------|

\*Alternatively chlorine tablets can be used for disinfection of CompactDry™ plates.

## Differences in *E. coli* risk level between point of collection and point of use

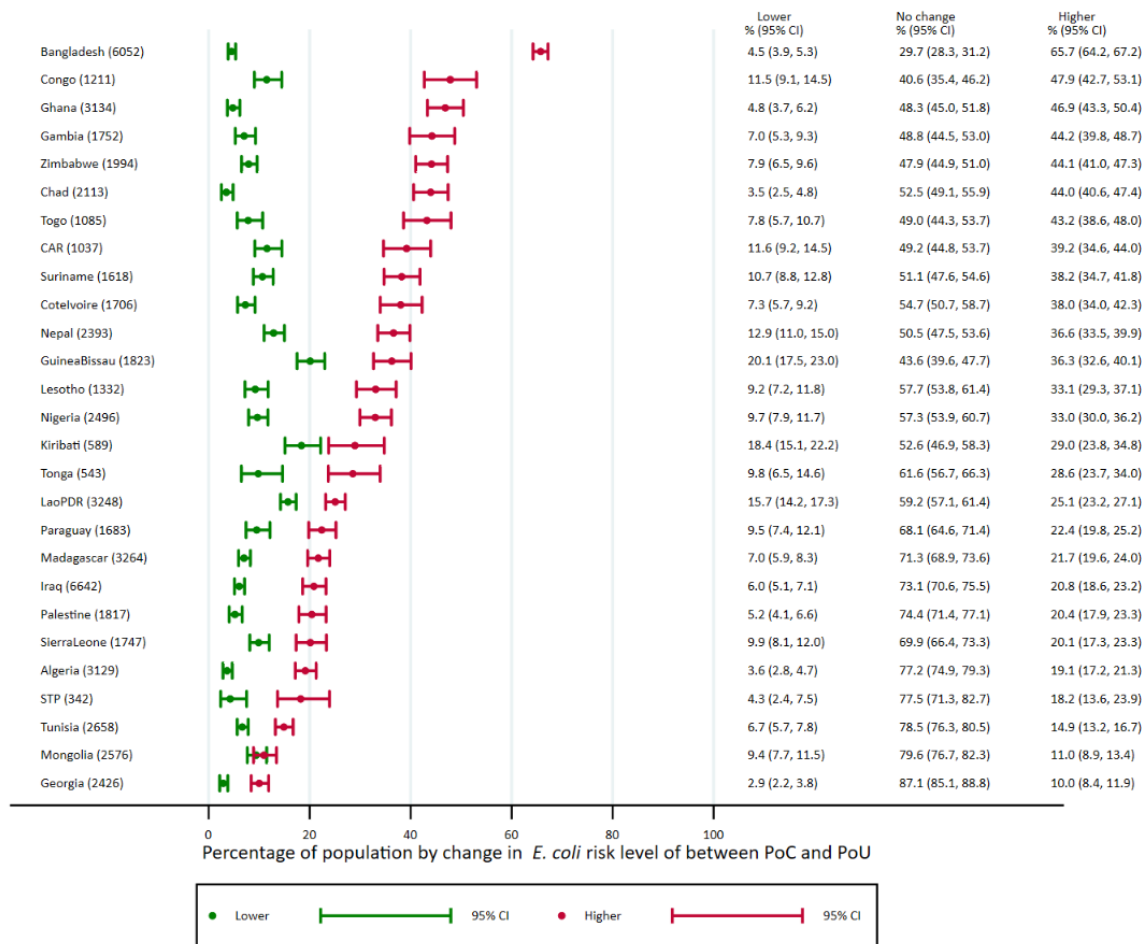

**Figure S2: Change in *E. coli* risk level for households.** Differences refer to changes in risk classification based on the number of colony forming units (CFU) per 100 mL as follows: <1 “Low risk”, 1-10 “Moderate risk”, 11-100 “High risk” and >100 “Very high risk”. CAR – Central African Republic, LaoPDR – Lao People’s Democratic Republic, STP – Sao Tome and Principe.

## Differences in *E. coli* risk level for households with *E. coli* detected at point of collection and reporting appropriate treatment practices

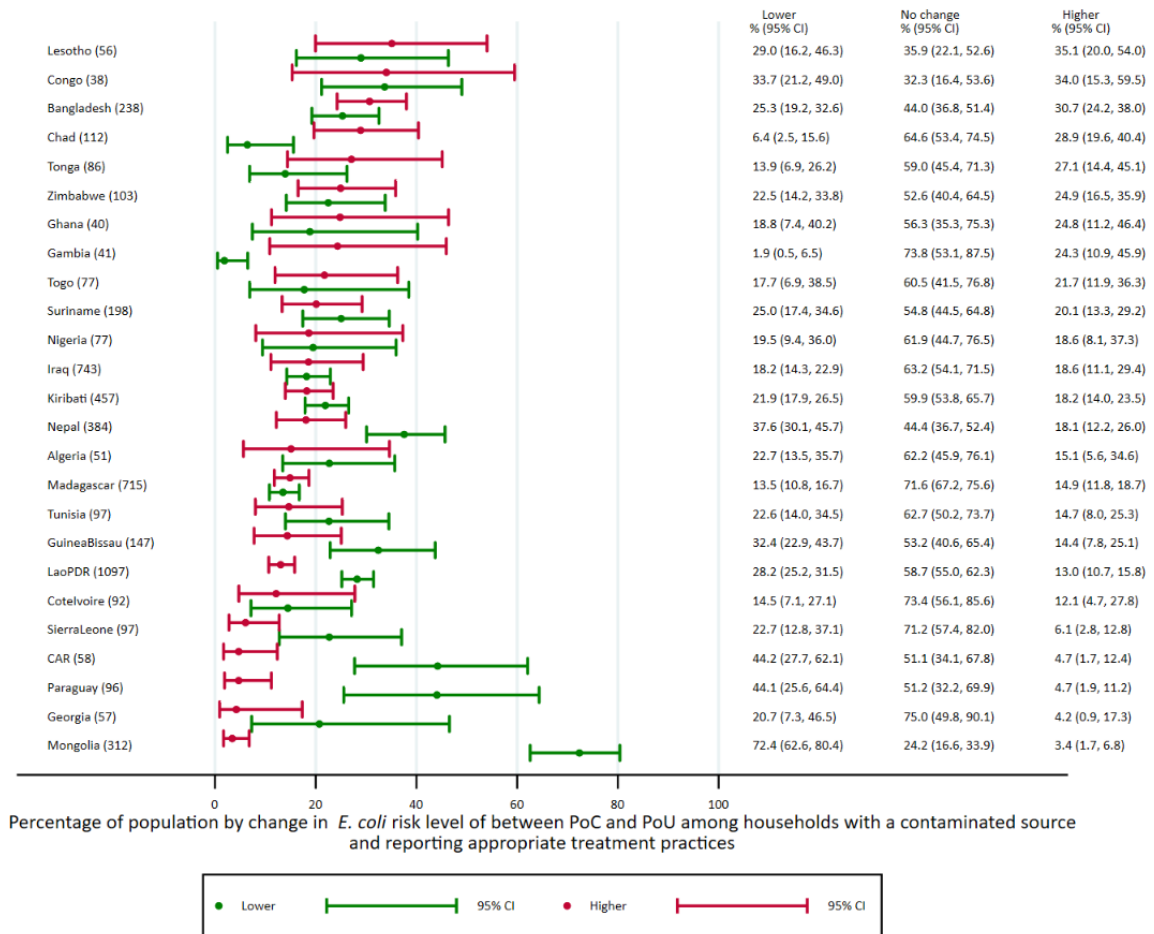

**Figure S3: Difference in *E. coli* risk level between point of collection and point of use for households with *E. coli* detected at point of collection and reporting appropriate treatment practices.** Differences refer to changes in risk classification based on the number of colony forming units (CFU) per 100 mL as follows: <1 “Low risk”, 1-10 “Moderate risk”, 11-100 “High risk” and >100 “Very high risk”. Appropriate water treatment practices include boiling, filtration, adding chlorine and solar disinfection. CAR – Central African Republic, LaoPDR – Lao People’s Democratic Republic, STP – Sao Tome and Principe. Excludes STP and Palestine where <25 samples available for households with contamination at the point of collection and reporting appropriate household water treatment practices.

## ***E. coli* risk level at point of use for households with *E. coli* detected at point of collection and reporting appropriate treatment practices**

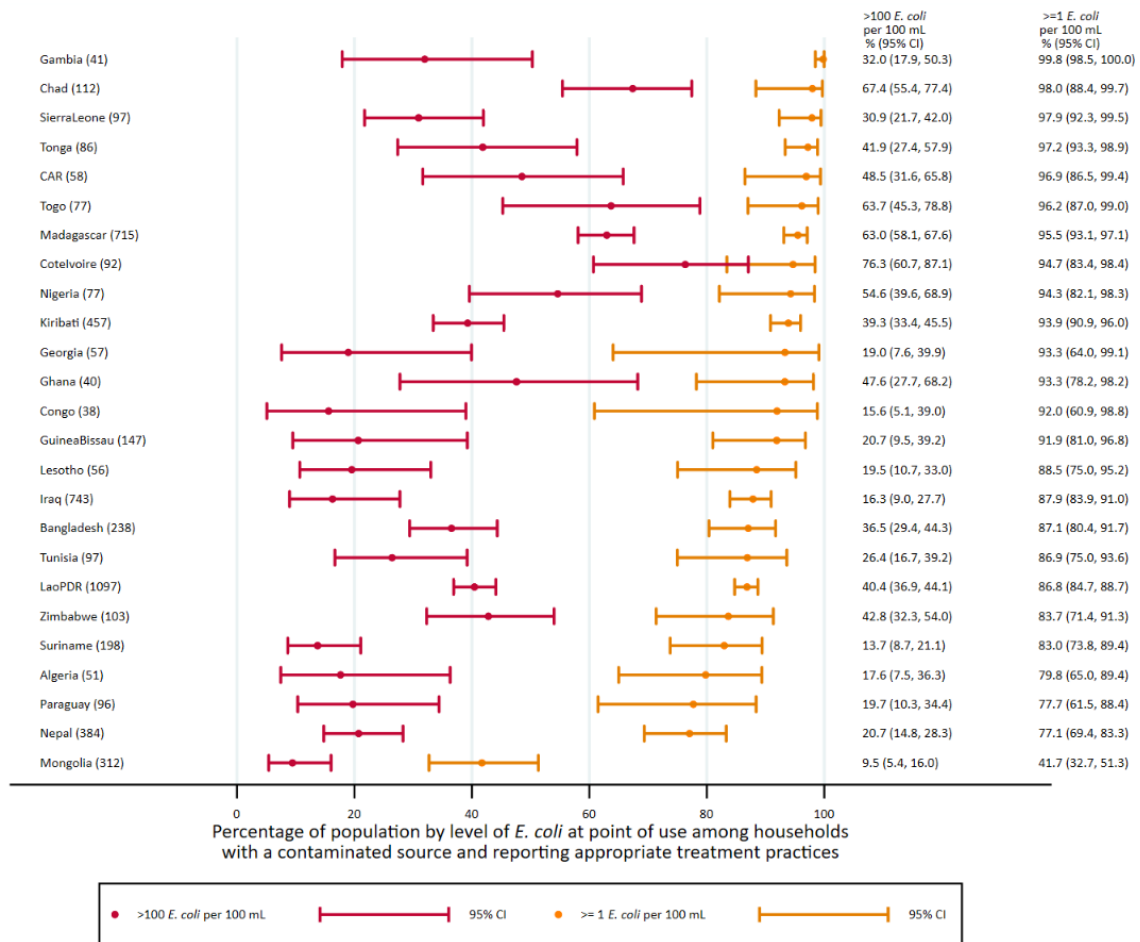

**Figure S4: *E. coli* risk level at point of use for households with contaminated drinking water sources reporting appropriate treatment practices.** Appropriate water treatment practices include boiling, filtration, adding chlorine and solar disinfection. CAR – Central African Republic, LaoPDR – Lao People’s Democratic Republic, STP – Sao Tome and Principe. Excludes STP and Palestine where <25 samples available for households with contamination at the point of collection and reporting appropriate household water treatment practices.

## Inconsistency checks

**Table S1: Proportion of *E. coli* samples flagged as potentially inconsistent**

| Country       | Point of collection |                      |              |      | Point of use |         |              |      |
|---------------|---------------------|----------------------|--------------|------|--------------|---------|--------------|------|
|               | Flag I <sup>a</sup> | Flag II <sup>b</sup> | Flag I or II | N    | Flag I       | Flag II | Flag I or II | N    |
| Congo         | 2.4                 | 0.7                  | 2.4          | 1271 | 2.5          | 0.7     | 2.5          | 1485 |
| Cote d'Ivoire | 1.6                 | 0.7                  | 1.6          | 1767 | 1.8          | 0.8     | 2.0          | 1901 |
| Nigeria       | 4.8                 | 2.1                  | 4.9          | 2718 | 4.0          | 1.3     | 4.1          | 3027 |
| Paraguay      | 1.7                 | 0.7                  | 1.7          | 1745 | 2.1          | 0.4     | 2.1          | 1788 |
| Total         | 2.6                 | 1.1                  | 2.7          | 7501 | 2.6          | 0.8     | 2.7          | 8201 |

<sup>a</sup>100 mL test is below 10 *E. coli* and 1 mL has at least one colony

<sup>b</sup>1 mL sample count greater than the 100 mL sample count provided both are non-zero and countable

## Blanks tests results

**Table S2: Proportion of blank tests with detectable *E. coli***

| Country       | Blank tests positive for <i>E. coli</i> (%) | Blank tests with $\geq 10$ <i>E. coli</i> per 100 mL (%) | Blank tests for <i>E. coli</i> (N) |
|---------------|---------------------------------------------|----------------------------------------------------------|------------------------------------|
| Algeria       | 0.3                                         | 0.1                                                      | 1223                               |
| Bangladesh    | 1.0                                         | 0.3                                                      | 627                                |
| CAR           | 1.1                                         | 0.5                                                      | 373                                |
| Chad          | 3.6                                         | 1.9                                                      | 695                                |
| Congo         | 2.5                                         | 0.0                                                      | 240                                |
| Cote Ivoire   | 8.2                                         | 0.4                                                      | 473                                |
| Gambia        | 6.2                                         | 1.1                                                      | 373                                |
| Georgia       | 0.0                                         | 0.0                                                      | 536                                |
| Ghana         | 1.6                                         | 0.3                                                      | 638                                |
| Guinea Bissau | 1.1                                         | 0.3                                                      | 366                                |
| Iraq          | 0.4                                         | 0.1                                                      | 1661                               |
| Kiribati      | 1.3                                         | 0.0                                                      | 150                                |
| Lao PDR       | 2.1                                         | 1.2                                                      | 1034                               |
| Lesotho       | 0.6                                         | 0.3                                                      | 327                                |
| Madagascar    | 0.9                                         | 0.7                                                      | 674                                |
| Mongolia      | 1.4                                         | 0.8                                                      | 500                                |
| Nepal         | 2.4                                         | 0.4                                                      | 508                                |
| Nigeria       | 1.2                                         | 0.4                                                      | 1018                               |
| Palestine     | 1.5                                         | 0.6                                                      | 344                                |
| Paraguay      | 0.0                                         | 0.0                                                      | 371                                |
| STP           | 0.0                                         | 0.0                                                      | 115                                |
| Sierra Leone  | 2.4                                         | 1.2                                                      | 591                                |
| Suriname      | 1.1                                         | 0.0                                                      | 272                                |
| Togo          | 2.1                                         | 0.3                                                      | 380                                |
| Tonga         | 0.8                                         | 0.0                                                      | 119                                |
| Tunisia       | 1.2                                         | 1.0                                                      | 497                                |
| Zimbabwe      | 1.2                                         | 0.0                                                      | 434                                |
| <b>Total</b>  | <b>1.6</b>                                  | <b>0.5</b>                                               | <b>14539</b>                       |



## Main source versus source of sample

**Table S3: Concordance between main water source and source of the sample of drinking water provided by survey respondents**

| Country                  | Sample from same class of source (%) <sup>a</sup> | N             |
|--------------------------|---------------------------------------------------|---------------|
| Algeria                  | 86.9 (85.0,88.5)                                  | 4,046         |
| Bangladesh               | 99.9 (99.8,100.0)                                 | 12,236        |
| Central African Republic | 94.8 (92.2,96.6)                                  | 1,212         |
| Chad                     | 78.7 (75.7,81.5)                                  | 2,148         |
| Congo                    | 91.6 (88.6,93.8)                                  | 1,507         |
| Cote d'Ivoire            | 91.4 (89.1,93.2)                                  | 1,903         |
| Gambia                   | 99.6 (99.1,99.8)                                  | 1,863         |
| Georgia                  | 92.6 (90.9,94.1)                                  | 2,691         |
| Ghana                    | 96.8 (94.9,98.1)                                  | 3,212         |
| Guinea Bissau            | 99.1 (98.5,99.5)                                  | 1,825         |
| Iraq                     | 99.7 (99.5,99.8)                                  | 5,897         |
| Kiribati                 | 72.7 (67.7,77.2)                                  | 606           |
| Lao PDR                  | 99.0 (98.4,99.3)                                  | 3,345         |
| Lesotho                  | 98.8 (97.4,99.4)                                  | 1,366         |
| Madagascar               | 92.5 (90.7,93.9)                                  | 3,433         |
| Mongolia                 | 83.9 (80.6,86.6)                                  | 2,724         |
| Nepal                    | 92.6 (91.0,94.0)                                  | 2,407         |
| Nigeria                  | 98.0 (97.0,98.6)                                  | 3,033         |
| Palestine                | 92.1 (90.3,93.6)                                  | 1,827         |
| Paraguay                 | 99.3 (98.7,99.7)                                  | 1,766         |
| Sao Tome and Principe    | 100.0 (100.0, 100.0)                              | 569           |
| Sierra Leone             | 93.6 (91.8,95.0)                                  | 1,773         |
| Suriname                 | 94.9 (93.0,96.4)                                  | 1,687         |
| Togo                     | 96.3 (94.2,97.7)                                  | 1,152         |
| Tonga                    | 84.0 (78.9,88.0)                                  | 610           |
| Tunisia                  | 98.9 (98.3,99.3)                                  | 2,756         |
| Zimbabwe                 | 86.6 (84.3,88.5)                                  | 2,121         |
| <b>Total</b>             | <b>93.1 (92.7,93.5)</b>                           | <b>69,715</b> |

<sup>a</sup>Sample reported as from main source or from same category of water source (packaged, piped, boreholes/tubewells, rainwater, delivered water, unimproved) used in this study. Proportions calculated using point of collection water quality sample weights normalized for each country.

**Table S4: Mean monthly precipitation above yearly mean precipitation**

| Country             | Mean precipitation above yearly mean precipitation between 2000 and 2019 (mm per month) |        |        |        |       |       |        |       |        |        |        |        | Wet seasons       |
|---------------------|-----------------------------------------------------------------------------------------|--------|--------|--------|-------|-------|--------|-------|--------|--------|--------|--------|-------------------|
|                     | Jan                                                                                     | Feb    | March  | April  | May   | June  | July   | Aug   | Sept   | Oct    | Nov    | Dec    |                   |
| Algeria             | 2.5                                                                                     | 1.1    | 1.4    | 0.3    | -0.2  | -4.7  | -4.9   | -1.8  | -0.1   | 0.9    | 3.4    | 2.2    | Oct-Apr           |
| Bangladesh          | -194.3                                                                                  | -184.1 | -158.9 | -46.0  | 25.6  | 197.2 | 359.8  | 235.0 | 117.5  | 9.2    | -168.6 | -192.4 | May-Oct           |
| CAR                 | -103.9                                                                                  | -96.4  | -57.6  | -18.3  | 29.8  | 50.1  | 95.1   | 117.3 | 104.3  | 57.8   | -75.1  | -103.2 | May-Oct           |
| Chad                | -27.1                                                                                   | -25.9  | -25.3  | -20.8  | -8.2  | 5.4   | 50.4   | 88.1  | 29.3   | -11.6  | -26.9  | -27.2  | June-Sept         |
| Congo <sup>a</sup>  | -26.9                                                                                   | -6.2   | 30.3   | 37.4   | 20.5  | -65.8 | -84.2  | -65.1 | -5.2   | 70.8   | 74.3   | 20.1   | Mar-May, Oct-Dec  |
| Gambia              | -71.9                                                                                   | -71.7  | -71.9  | -71.8  | -66.3 | 5.7   | 112.2  | 216.9 | 162.4  | -1.3   | -70.2  | -72.0  | June-Sept         |
| Georgia             | -11.4                                                                                   | -22.9  | -2.2   | 3.5    | 30.1  | 38.0  | 5.7    | -9.5  | -1.8   | 2.0    | -14.7  | -16.8  | Apr-July          |
| Ghana               | -88.8                                                                                   | -71.1  | -33.5  | 7.4    | 41.7  | 68.4  | 55.2   | 49.2  | 75.2   | 38.1   | -57.5  | -84.1  | April-Oct         |
| Guinea-Bissau       | -133.4                                                                                  | -133.4 | -133.3 | -132.4 | -91.5 | 35.2  | 222.1  | 364.8 | 234.9  | 16.5   | -116.4 | -133.1 | June-Oct          |
| Iraq                | 15.4                                                                                    | 11.8   | 13.0   | 11.5   | -5.5  | -14.9 | -15.3  | -15.4 | -15.3  | -6.7   | 6.3    | 15.1   | Nov-Apr           |
| Israel <sup>b</sup> | 72.5                                                                                    | 45.8   | 3.3    | -14.4  | -28.4 | -32.0 | -32.0  | -32.0 | -31.8  | -14.7  | 9.5    | 54.1   | Nov-Mar           |
| Cote d'Ivoire       | -99.7                                                                                   | -79.4  | -37.6  | 9.5    | 52.1  | 89.8  | 38.4   | 41.9  | 76.2   | 42.6   | -43.7  | -90.1  | Apr-Oct           |
| Kiribati            | 86.6                                                                                    | 31.8   | 17.2   | 8.4    | -23.6 | -28.6 | 10.7   | -30.4 | -43.4  | -48.0  | -35.7  | 54.9   | Dec-Apr           |
| Laos                | -127.2                                                                                  | -135.0 | -103.0 | -60.7  | 31.4  | 89.4  | 149.4  | 187.8 | 96.2   | 8.3    | -38.9  | -97.7  | May-Oct           |
| Lesotho             | 67.5                                                                                    | 37.5   | 27.4   | -8.1   | -36.8 | -47.2 | -54.3  | -44.1 | -30.3  | -0.8   | 32.5   | 56.5   | Nov-Mar           |
| Madagascar          | 166.0                                                                                   | 132.0  | 75.2   | -26.2  | -67.1 | -70.2 | -61.9  | -76.7 | -89.7  | -66.3  | -5.1   | 90.1   | Dec-Mar           |
| Mongolia            | -16.7                                                                                   | -16.3  | -13.4  | -7.0   | 2.6   | 20.7  | 37.6   | 28.0  | 1.4    | -9.2   | -12.8  | -15.0  | May-Sept          |
| Nepal               | -86.8                                                                                   | -68.4  | -63.8  | -49.0  | 15.2  | 67.5  | 209.1  | 150.2 | 74.7   | -59.9  | -95.0  | -93.8  | May-Sept          |
| Nigeria             | -91.9                                                                                   | -86.6  | -67.2  | -34.7  | 19.6  | 71.0  | 105.3  | 133.9 | 112.1  | 10.3   | -80.1  | -91.6  | May-Oct           |
| Paraguay            | 35.6                                                                                    | 35.0   | 4.7    | 17.4   | 2.9   | -45.5 | -49.7  | -70.7 | -41.3  | 29.5   | 48.4   | 33.7   | Oct-May           |
| STP <sup>a</sup>    | -29.5                                                                                   | -42.3  | 14.6   | 20.9   | 45.4  | -55.6 | -106.9 | -77.1 | 20.3   | 150.7  | 59.3   | 0.1    | Mar-May, Sept-Dec |
| Sierra Leone        | -202.1                                                                                  | -191.2 | -172.3 | -115.4 | -0.4  | 90.0  | 230.4  | 382.4 | 207.5  | 70.4   | -111.4 | -187.9 | June-Oct          |
| Suriname            | 10.1                                                                                    | 10.8   | 8.2    | 98.7   | 182.6 | 82.2  | 41.6   | -44.6 | -126.2 | -135.9 | -106.6 | -20.9  | Jan-July          |
| Togo                | -89.3                                                                                   | -78.9  | -43.3  | -9.7   | 34.8  | 67.4  | 70.6   | 77.6  | 98.8   | 28.2   | -66.8  | -89.5  | May-Oct           |
| Tonga               | 63.2                                                                                    | 52.5   | 117.0  | 52.2   | -38.6 | -71.2 | -62.0  | -59.3 | -28.3  | -24.5  | -5.0   | 4.0    | Dec-Apr           |
| Tunisia             | 12.9                                                                                    | 7.8    | 6.9    | 0.8    | -8.5  | -19.6 | -23.2  | -17.8 | 1.4    | 14.7   | 8.8    | 15.8   | Sept-Apr          |
| Zimbabwe            | 101.7                                                                                   | 69.3   | 36.2   | -24.8  | -50.2 | -51.6 | -53.7  | -55.0 | -51.2  | -34.9  | 20.5   | 93.6   | Nov-Mar           |

<sup>a</sup>Two distinct wet seasons.

<sup>b</sup>Precipitation data not available for Palestine.

CAR – Central African Republic; STP – Sao Tome and Principe

Source: Author's calculations based on Climatic Research Unit (University of East Anglia) and Met Office (Harris et al. 2020)

## Main reasons point of collection sample not collected

Table S5: Main reasons point of collection sample not collected

| Country       | Point of collection not shown % (95% CI) | Number of households asked to show point of collection | Source not functional % (95% CI) | Source too far % (95% CI) | Unable to access source % (95% CI) | Do not know where source is located % (95% CI) | Other or missing % (95% CI) | Number of households where the point of collection was not shown |
|---------------|------------------------------------------|--------------------------------------------------------|----------------------------------|---------------------------|------------------------------------|------------------------------------------------|-----------------------------|------------------------------------------------------------------|
| Algeria       | 22.5 (20.3,24.9)                         | 4,076                                                  | 16 (12.6,20.1)                   | 35.9 (30.6,41.5)          | 34.1 (28.6,40.1)                   | 5.2 (3.5,7.5)                                  | 8.8 (6.0,12.9)              | 839                                                              |
| Bangladesh    | 1.1 (0.8,1.4)                            | 6,140                                                  | 20.3 (11.0,34.6)                 | 47 (32.7,61.8)            | 0                                  | 21 (10.1,38.7)                                 | 11.6 (4.6,26.3)             | 61                                                               |
| CAR           | 10.7 (8.4,13.4)                          | 1,212                                                  | 10.8 (6.0,18.8)                  | 72.1 (61.2,81.0)          | 2.3 (0.6,8.5)                      | 0.9 (0.2,3.7)                                  | 13.8 (7.3,24.6)             | 137                                                              |
| Chad          | 4.4 (2.7,7.0)                            | 2,275                                                  | 14.3 (4.7,36.5)                  | 48.6 (26.5,71.1)          | 11.4 (4.9,24.4)                    | 8.5 (3.9,17.4)                                 | 17.2 (6.7,37.4)             | 94                                                               |
| Congo         | 16.6 (12.9,21.1)                         | 1,560                                                  | N/A                              | 23.9 (14.9,36.1)          | 19.1 (11.5,30.0)                   | 0                                              | 57 (43.3,69.7)              | 209                                                              |
| Cote d'Ivoire | 3.7 (2.6,5.3)                            | 1,918                                                  | N/A                              | 31.8 (19.5,47.3)          | 15.8 (7.8,29.6)                    | 0                                              | 52.3 (36.7,67.5)            | 103                                                              |
| Gambia        | 3.2 (2.0,4.9)                            | 1,865                                                  | 29.3 (13.6,52.3)                 | 2.1 (0.3,14.2)            | 64.7 (43.3,81.4)                   | 3.9 (1.5,9.6)                                  | 0                           | 54                                                               |
| Georgia       | 9 (7.3,11.1)                             | 2,699                                                  | 47.3 (36.9,58.0)                 | 23 (16.2,31.5)            | 16.4 (10.8,24.2)                   | 2.2 (0.8,5.6)                                  | 11.1 (6.4,18.5)             | 227                                                              |
| Ghana         | 1.3 (0.7,2.4)                            | 3,219                                                  | 14 (4.9,34.0)                    | 13 (5.1,29.4)             | 35.5 (13.1,66.7)                   | 36.9 (18.6,59.9)                               | 0.7 (0.1,5.0)               | 46                                                               |
| Guinea Bissau | 2.2 (1.3,3.7)                            | 1,828                                                  | 23.6 (8.6,50.1)                  | 63.4 (38.1,83.0)          | 3.9 (0.9,15.2)                     | 0                                              | 9.1 (1.3,43.6)              | 21                                                               |
| Iraq          | 0.1 (0.0,0.2)                            | 6,724                                                  | 30.6 (11.2,60.8)                 | 21.2 (4.2,62.5)           | 19.7 (2.5,70.5)                    | 0                                              | 28.4 (3.9,79.5)             | 6                                                                |
| Kiribati      | 8.1 (4.4,14.6)                           | 622                                                    | 89.3 (69.7,96.8)                 | 3.9 (0.5,24.0)            | 6.8 (1.7,24.0)                     | 0                                              | 0                           | 29                                                               |
| Lao PDR       | 1.1 (0.6,1.8)                            | 3,346                                                  | 6.5 (1.4,26.0)                   | 74.7 (54.3,88.0)          | 6.1 (1.5,21.7)                     | 0                                              | 12.6 (4.1,32.7)             | 35                                                               |
| Lesotho       | 1.5 (0.8,2.8)                            | 1,373                                                  | 45 (18.3,74.9)                   | 4.3 (0.9,17.4)            | 6.3 (0.8,35.3)                     | 0                                              | 44.4 (17.1,75.6)            | 15                                                               |
| Madagascar    | 3.5 (2.4,4.9)                            | 3,433                                                  | 7.2 (3.1,15.8)                   | 66.7 (46.7,82.1)          | 23.8 (10.0,46.9)                   | 1.6 (0.2,10.5)                                 | 0.6 (0.1,4.4)               | 105                                                              |
| Mongolia      | 2.9 (1.6,5.0)                            | 2,736                                                  | 55.4 (29.9,78.3)                 | 36 (17.3,60.3)            | 2 (0.7,5.7)                        | 4.6 (1.4,13.8)                                 | 2 (0.5,7.5)                 | 75                                                               |
| Nepal         | 2.4 (1.7,3.4)                            | 2,546                                                  | 33.9 (20.0,51.3)                 | 55.4 (38.4,71.2)          | 1.7 (0.4,6.1)                      | 2.8 (0.6,13.2)                                 | 6.2 (1.4,23.1)              | 73                                                               |
| Nigeria       | 7.3 (5.8,9.1)                            | 3,053                                                  | 15.3 (9.0,24.7)                  | 18.3 (12.1,26.7)          | 18.3 (10.6,29.5)                   | 14.3 (7.4,25.8)                                | 33.9 (22.2,48.0)            | 311                                                              |
| Palestine     | 1.4 (0.8,2.5)                            | 1,848                                                  | 31.9 (13.5,58.5)                 | 4.3 (0.6,26.1)            | 41.7 (16.5,72.1)                   | 0.7 (0.1,5.1)                                  | 21.4 (7.2,49.0)             | 22                                                               |
| Paraguay      | 2.2 (1.4,3.5)                            | 1,765                                                  | 36.2 (17.6,60.1)                 | 18.8 (7.6,39.5)           | 38.6 (19.8,61.6)                   | 0                                              | 6.4 (1.6,21.6)              | 37                                                               |
| STP           | 8.3 (4.9,13.9)                           | 571                                                    | 10.2 (2.7,31.9)                  | 76.4 (56.5,89.0)          | 3.4 (0.5,21.3)                     | 1.2 (0.2,8.3)                                  | 8.9 (2.7,25.8)              | 44                                                               |
| Sierra Leone  | 1.1 (0.6,1.9)                            | 1,780                                                  | 8.2 (2.4,25.0)                   | 0                         | 23.3 (6.5,56.8)                    | 4.4 (0.6,26.4)                                 | 64.1 (34.2,86.0)            | 21                                                               |
| Suriname      | 5.9 (4.4,7.9)                            | 1,701                                                  | 17 (8.5,31.1)                    | 5.9 (2.1,15.5)            | 67.5 (52.5,79.6)                   | 2.6 (0.7,9.3)                                  | 7 (2.3,19.1)                | 82                                                               |
| Togo          | 3.9 (2.5,6.2)                            | 1,153                                                  | 15.1 (5.5,35.3)                  | 15.6 (6.1,34.6)           | 23 (7.3,53.2)                      | 19.8 (9.6,36.6)                                | 26.4 (11.9,48.9)            | 45                                                               |
| Tonga         | 13.4 (9.0,19.5)                          | 613                                                    | 15.2 (6.8,30.8)                  | 66.9 (47.5,81.9)          | 15.8 (6.3,34.7)                    | 2 (0.6,6.7)                                    | 0                           | 67                                                               |
| Tunisia       | 2.9 (2.1,4.0)                            | 2,769                                                  | 19.4 (10.3,33.4)                 | 31.4 (21.2,43.8)          | 20.2 (11.7,32.7)                   | 14.4 (7.2,26.6)                                | 14.6 (7.7,26.0)             | 77                                                               |
| Zimbabwe      | 1.6 (1.1,2.6)                            | 2,124                                                  | 62 (41.8,78.8)                   | 9.8 (2.9,28.0)            | 13.2 (4.5,33.2)                    | 2.1 (0.3,13.9)                                 | 12.8 (4.6,30.8)             | 35                                                               |
| Total         | 5.3 (4.8,5.7)                            | 64,949                                                 | 21.6 (18.0,25.7)                 | 36.8 (32.8,40.9)          | 20.4 (17.7,23.5)                   | 4.1 (3.2,5.1)                                  | 17.2 (14.4,20.3)            | 2870                                                             |

NA – response “source not functional” not included in Congo or Cote d'Ivoire. Proportions calculated using point of collection water quality sample weights normalized for each country. CAR – Central African Republic; STP – Sao Tome and Principe.

## Main reasons drinking water unavailable

**Table S6: Main reasons drinking water unavailable**

| Country       | Water not available during last month % (95% CI) | Number of households reporting on availability of drinking water in the last month | Water not available from source % (95% CI) | Water too expensive % (95% CI) | Source not accessible % (95% CI) | Other % (95% CI) | Don't Know % (95% CI) | Number of households without water available in the last month |
|---------------|--------------------------------------------------|------------------------------------------------------------------------------------|--------------------------------------------|--------------------------------|----------------------------------|------------------|-----------------------|----------------------------------------------------------------|
| Algeria       | 26.7 (25.1,28.4)                                 | 29,882                                                                             | 74.7 (71.4,77.8)                           | 4.3 (2.9,6.4)                  | 9.4 (8.0,11.0)                   | 5 (3.7,6.6)      | 6.6 (5.4,8.1)         | 7,323                                                          |
| Bangladesh    | 3.0 (2.8,3.3)                                    | 61,230                                                                             | 71.1 (68.2,73.8)                           | 4.3 (3.5,5.4)                  | 17.2 (14.9,19.8)                 | 6.6 (5.5,8.0)    | 0.8 (0.4,1.5)         | 2,023                                                          |
| CAR           | 39.0 (36.6,41.5)                                 | 8,131                                                                              | 72.7 (69.8,75.4)                           | 4.2 (3.2,5.4)                  | 17 (14.9,19.4)                   | 6 (4.8,7.4)      | 0.1 (0.1,0.3)         | 3,132                                                          |
| Chad          | 22.7 (21.1,24.4)                                 | 18,964                                                                             | 58.9 (55.6,62.1)                           | 15.2 (13.0,17.8)               | 17 (14.8,19.4)                   | 8.6 (7.0,10.7)   | 0.2 (0.1,0.5)         | 4,306                                                          |
| Gambia        | 12.4 (10.8,14.1)                                 | 7,402                                                                              | 84.4 (80.1,87.9)                           | 0.4 (0.1,1.0)                  | 8.1 (5.8,11.2)                   | 5.1 (3.3,7.8)    | 2.0 (0.8,5.0)         | 1,082                                                          |
| Georgia       | 22.2 (20.2,24.3)                                 | 12,240                                                                             | 80.1 (77.1,82.7)                           | 0.1 (0.0,0.2)                  | 6.7 (5.3,8.4)                    | 4.5 (3.2,6.1)    | 8.7 (6.8,11.1)        | 2,454                                                          |
| Ghana         | 11.6 (10.2,13.1)                                 | 12,885                                                                             | 66.2 (59.1,72.6)                           | 2.1 (1.2,3.4)                  | 17.7 (14.3,21.7)                 | 10.0 (5.1,18.6)  | 4.0 (2.6,6.1)         | 1,352                                                          |
| Guinea Bissau | 15.7 (13.1,18.7)                                 | 7,379                                                                              | 85.9 (80.6,89.9)                           | 3.4 (1.8,6.1)                  | 8.3 (4.9,13.8)                   | 2.3 (1.3,4.0)    | 0.1 (0.0,0.8)         | 814                                                            |
| Iraq          | 22.3 (20.4,24.3)                                 | 20,190                                                                             | 90.2 (88.2,91.9)                           | 2.0 (1.4,2.9)                  | 5.6 (4.3,7.2)                    | 1.3 (0.9,1.9)    | 0.9 (0.5,1.4)         | 4,922                                                          |
| Kiribati      | 31.8 (28.0,35.8)                                 | 3,070                                                                              | 57.9 (52.1,63.4)                           | 0.3 (0.1,1.7)                  | 21.3 (17.2,26.0)                 | 20.5 (16.2,25.6) | 0.0 (0.0,0.0)         | 735                                                            |
| Lao PDR       | 3.6 (3.0,4.2)                                    | 22,282                                                                             | 68.7 (62.9,73.9)                           | 0.9 (0.4,2.0)                  | 6.2 (4.4,8.6)                    | 21.8 (17.5,26.8) | 2.4 (1.6,3.7)         | 1,033                                                          |
| Lesotho       | 16.1 (14.5,17.9)                                 | 8,844                                                                              | 81.1 (77.6,84.1)                           | 1.8 (1.1,3.0)                  | 5.5 (4.0,7.6)                    | 9.7 (7.6,12.3)   | 1.9 (1.0,3.5)         | 1,290                                                          |
| Madagascar    | 11.4 (10.2,12.6)                                 | 17,866                                                                             | 74.0 (70.1,77.6)                           | 1.9 (1.0,3.5)                  | 10.4 (8.0,13.3)                  | 12.6 (10.0,15.7) | 1.1 (0.6,2.0)         | 2,003                                                          |
| Mongolia      | 14.1 (12.0,16.6)                                 | 13,793                                                                             | 57.7 (50.1,64.9)                           | 0.2 (0.1,1.0)                  | 5.9 (3.5,9.8)                    | 33.2 (26.4,40.8) | 2.9 (1.8,4.9)         | 1,137                                                          |
| Nepal         | 19.6 (17.6,21.7)                                 | 12,654                                                                             | 68.8 (63.9,73.3)                           | 6.0 (3.6,9.8)                  | 14.5 (12.1,17.4)                 | 9.5 (6.4,13.7)   | 1.2 (0.7,2.0)         | 2,770                                                          |
| Palestine     | 10.8 (9.6,12.1)                                  | 9,319                                                                              | 67.9 (62.6,72.8)                           | 7.9 (5.3,11.5)                 | 10.3 (7.6,13.8)                  | 7.5 (5.3,10.7)   | 6.3 (4.3,9.2)         | 1,147                                                          |
| Paraguay      | 16.8 (14.8,18.9)                                 | 7,313                                                                              | 75.9 (71.0,80.2)                           | 0.1 (0.0,0.5)                  | 4.6 (3.0,7.1)                    | 13.4 (10.7,16.5) | 5.9 (4.1,8.5)         | 1,242                                                          |
| STP           | 29.9 (26.7,33.4)                                 | 3,426                                                                              | 92.5 (89.3,94.8)                           | 0.1 (0.0,0.7)                  | 4.2 (2.5,6.9)                    | 3.0 (1.9,4.8)    | 0.2 (0.1,0.6)         | 938                                                            |
| Sierra Leone  | 28.4 (26.6,30.2)                                 | 15,306                                                                             | 88.0 (85.9,89.8)                           | 2.2 (1.5,3.3)                  | 6.6 (5.3,8.3)                    | 2.9 (2.1,4.0)    | 0.3 (0.1,0.6)         | 3,964                                                          |
| Suriname      | 16.3 (14.6,18.2)                                 | 7,904                                                                              | 62.2 (57.6,66.5)                           | 0.9 (0.5,1.7)                  | 9.3 (6.0,14.1)                   | 17.5 (14.4,21.0) | 10.1 (7.7,13.1)       | 1,190                                                          |
| Togo          | 15.8 (13.9,17.9)                                 | 7,916                                                                              | 75.4 (69.7,80.3)                           | 1.7 (0.8,3.8)                  | 11.6 (8.8,15.1)                  | 11.3 (7.8,15.9)  | 0.1 (0.0,0.4)         | 1,164                                                          |
| Tonga         | 8.9 (7.4,10.6)                                   | 2,498                                                                              | 72.8 (65.8,78.8)                           | 5.5 (2.5,11.7)                 | 12.5 (8.5,17.9)                  | 9.2 (5.1,15.9)   | 0.0 (0.0,0.0)         | 237                                                            |

|              |                         |                |                         |                      |                        |                      |                      |               |
|--------------|-------------------------|----------------|-------------------------|----------------------|------------------------|----------------------|----------------------|---------------|
| Tunisia      | 18.8 (17.1,20.5)        | 11,223         | 77.1 (73.7,80.1)        | 0.0 (0.0,0.0)        | 6.8 (5.4,8.6)          | 6.4 (5.0,8.2)        | 9.7 (7.8,12.1)       | 2,053         |
| Zimbabwe     | 19.8 (18.2,21.6)        | 11,091         | 83.4 (80.1,86.2)        | 0.6 (0.3,1.1)        | 5.6 (4.3,7.3)          | 10.3 (8.2,12.9)      | 0.1 (0.0,0.3)        | 2,408         |
| <b>Total</b> | <b>18.2 (17.8,18.7)</b> | <b>332,808</b> | <b>75.3 (74.3,76.2)</b> | <b>2.8 (2.5,3.1)</b> | <b>10.3 (9.7,11.0)</b> | <b>9.0 (8.4,9.7)</b> | <b>2.6 (2.3,2.8)</b> | <b>50,719</b> |

Households were asked whether sufficient quantities of water were available from the main source during the last month. Data not available for Congo, Cote d'Ivoire and Nigeria. Proportions calculated using normalized sample weights for household reporting on drinking water availability within each country.

CAR – Central African Republic; STP – Sao Tome and Principe
