# Supplementary material
Source: PubMed Central journal article supplement (PMC8454503)
Supplement: ehp8459.smcontents.508.pdf [file ehp8459.smcontents.508.pdf]

**Note to readers with disabilities:** *EHP* strives to ensure that all journal content is accessible to all readers. However, some figures and Supplemental Material published in *EHP* articles may not conform to [508 standards](#) due to the complexity of the information being presented. If you need assistance accessing journal content, please contact [ehp508@niehs.nih.gov](mailto:ehp508@niehs.nih.gov). Our staff will work with you to assess and meet your accessibility needs within 3 working days.

### **Supplemental Material**

#### **Monitoring Drinking Water Quality in Nationally Representative Household Surveys in Low- and Middle-Income Countries: Cross-Sectional Analysis of 27 Multiple Indicator Cluster Surveys 2014–2020**

Robert Bain, Richard Johnston, Shane Khan, Attila Hancioglu, and Tom Slaymaker

#### **Table of Contents**

##### ***Water testing equipment and consumables***

**Figure S1. Equipment and consumables used for water quality testing** Photo credit: Yadigar Coskun.

##### **Differences in *E. coli* risk level between point of collection and point of use**

**Figure S2. Change in *E. coli* risk level for households.** Differences refer to changes in risk classification based on the number of colony forming units (CFU) per 100 mL as follows: <1 “Low risk”, 1-10 “Moderate risk”, 11-100 “High risk” and >100 “Very high risk”. CAR – Central African Republic, LaoPDR – Lao People’s Democratic Republic, STP – Sao Tome and Principe.

##### **Differences in *E. coli* risk level for households with *E. coli* detected at point of collection and reporting appropriate treatment practices**

**Figure S3. Difference in *E. coli* risk level between point of collection and point of use for households with *E. coli* detected at point of collection and reporting appropriate treatment practices.** Differences refer to changes in risk classification based on the number of colony forming units (CFU) per 100 mL as follows: <1 “Low risk”, 1-10 “Moderate risk”, 11-100 “High risk” and >100 “Very high risk”. Appropriate water treatment practices include boiling, filtration, adding chlorine and solar disinfection. CAR – Central African Republic, LaoPDR – Lao People’s Democratic Republic, STP – Sao Tome and Principe. Excludes STP and Palestine where <25 samples available for households with contamination at the point of collection and reporting appropriate household water treatment practices.

***E. coli* risk level at point of use for households with *E. coli* detected at point of collection and reporting appropriate treatment practices**

**Figure S4. *E. coli* risk level at point of use for households with contaminated drinking water sources reporting appropriate treatment practices.** Appropriate water treatment practices include boiling, filtration, adding chlorine and solar disinfection. CAR – Central African Republic, LaoPDR – Lao People’s Democratic Republic, STP – Sao Tome and Principe. Excludes STP and Palestine where <25 samples available for households with contamination at the point of collection and reporting appropriate household water treatment practices.

**Inconsistency checks**

**Table S1.** Proportion of *E. coli* samples flagged as potentially inconsistent.

**Blanks tests results**

**Table S2.** Proportion of blank tests with detectable *E. coli*.

**Main source versus source of sample**

**Table S3.** Concordance between main water source and source of the sample of drinking water provided by survey respondents.

**Table S4.** Mean monthly precipitation above yearly mean precipitation.

**Main reasons point of collection sample not collected**

**Table S5.** Main reasons point of collection sample not collected.

**Main reasons drinking water unavailable**

**Table S6.** Main reasons drinking water unavailable.

**Additional File-** Excel Document
